# Supplementary material for: Francisella requires dynamic type VI secretion system and ClpB to deliver effectors for phagosomal escape
Source: PubMed Central journal article supplement (PMC5481754; doi:10.1038/ncomms15853), 2017-06-16
Supplement: ncomms15853-s1.pdf [file ncomms15853-s1.pdf]

Type of file: PDF  
Size of file: 0 KB  
Title of file for HTML: Supplementary Information  
Description: Supplementary Figures and Supplementary Tables

Type of file: MP4  
Size of file: 0 KB  
Title of file for HTML: Supplementary Movie 1  
Description: T6SS sheath dynamics in wild-type and mutant strains. IglAsfGFP was monitored in *F. novicida* U112 *iglA*-sfGFP wild-type,  $\Delta$ pdpE,  $\Delta$ anmK,  $\Delta$ pdpC,  $\Delta$ pdpD,  $\Delta$ pdpD/anmK,  $\Delta$ pdpC/pdpD,  $\Delta$ pdpC/pdpD/anmK and  $\Delta$ clpB for 5 min at a frame rate of 20 frames per minute. 2 representative time-lapse image series for each strain are shown. Merge of phase contrast and GFP channel is shown. Fields of view are 39 x 26  $\mu$ m. Videos play at a frame rate of 10 frames per second.

Type of file: MP4  
Size of file: 0 KB  
Title of file for HTML: Supplementary Movie 2  
Description: Knockout of critical components abolishes T6SS dynamics. IglAsfGFP was monitored in *F. novicida* U112 *iglA*-sfGFP  $\Delta$ pdpB,  $\Delta$ clpB/pdpB,  $\Delta$ iglF,  $\Delta$ iglG,  $\Delta$ iglI and  $\Delta$ iglJ for 5 min at a frame rate of 2 frames per minute. 2 representative time-lapse image series for each strain are shown. Merge of phase contrast and GFP channel is shown. Fields of view are 39 x 26  $\mu$ m. Videos play at a frame rate of 5 frames per second.

Type of file: MP4  
Size of file: 0 KB  
Title of file for HTML: Supplementary Movie 3  
Description: ClpB spots co-localize with contracted sheaths. IglA-sfGFP and ClpB-mCherry2 was monitored in *F. novicida* U112 *iglA*-sfGFP *clpB*-mCherry2, *iglA*-sfGFP *clpB*mCherry2  $\Delta$ pdpB and *clpB*-mCherry2 for 5 min at a frame rate of 2 frames per minute. 2 representative time-lapse image series for each strain are shown. Merge of phase contrast, GFP and mCherry channels is shown. Fields of view are 39 x 26  $\mu$ m. Videos play at a frame rate of 5 frames per second.

Type of file: MP4  
Size of file: 0 KB  
Title of file for HTML: Supplementary Movie 4  
Description: Examples of wild-type and  $\Delta$ clpB T6SS sheath dynamics. IglAsfGFP was monitored in *F. novicida* U112 *iglA*-sfGFP wild-type and  $\Delta$ clpB for 5 min at a frame rate of 20 frames per minute. 10 representative time-lapse image series for each strain are shown. GFP channel is shown. Fields of view are 3.3 x 3.3  $\mu$ m. Videos play at a frame rate of 10 frames per second.

Type of file: MP4  
Size of file: 0 KB  
Title of file for HTML: Supplementary Movie 5  
Description: Examples of co-localization of ClpB with contracted sheath. IglAsfGFP and ClpB-mCherry2 was monitored in *F. novicida* U112 *iglA*-sfGFP *clpB*-mCherry2 for 5 min at a frame rate of 20 frames per minute. 10 representative time-lapse image series are shown. Left fields show GFP channel and right fields show mCherry channel. Fields of view are

3.3 x 3.3  $\mu\text{m}$ . Videos play at a frame rate of 10 frames per second.

Type of file: MP4

Size of file: 0 KB

Title of file for HTML: Supplementary Movie 6

Description: Examples of T6SS dynamics in infected bone marrow derived macrophages. IglA-sfGFP and ClpB-mCherry2 was monitored in *F. novicida* U112 iglA-sfGFP clpB-mCherry2 for 10 min at a frame rate of 2 frames per minute. 5 representative time-lapse image series are shown. Left fields show phase contrast channel, middle fields show GFP channel and right fields show mCherry channel. Fields of view are 30 x 30  $\mu\text{m}$ . Videos play at a frame rate of 5 frames per second.

Type of file: PDF

Size of file: 0 KB

Title of file for HTML: Peer Review File

Description:

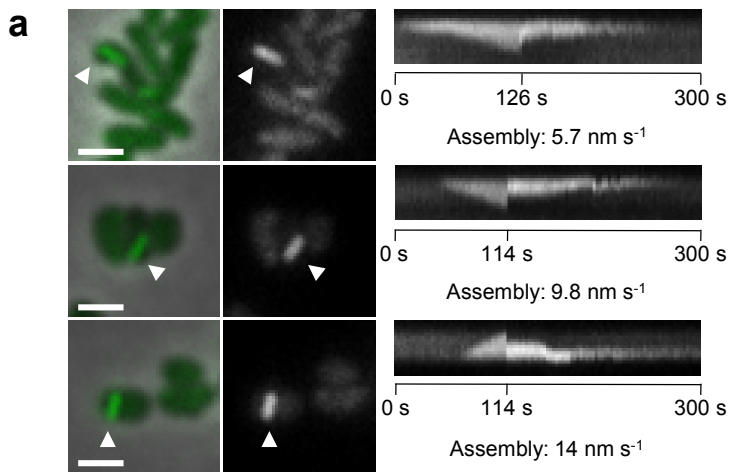

**b**

$$\frac{GFP\ intensity_{Before\ assembly}}{GFP\ intensity_{After\ assembly}} = 1.06 \pm 0.07$$

$$\frac{GFP\ intensity_{F.novicida\ U112-sfGFP\ \Delta pdpB}}{GFP\ intensity_{F.novicida\ U112-sfGFP}} = 0.96 \pm 0.23$$

**Supplementary Figure 1 : Assembly speed varies between bacteria. (a)** Kymograms of slow ( $\sim 5\text{ nm s}^{-1}$ ) to fast ( $\sim 14\text{ nm s}^{-1}$ ) T6SS assemblies (arrowheads) over 5 minutes (3 s per pixel) in *F. novicida* U112 *igIA-sfGFP*. First image is a merge of phase contrast and GFP channel, following images represent GFP channel only.  $3.3 \times 3.3\ \mu\text{m}$  fields of view are shown. Scale bars represent  $1\ \mu\text{m}$ . **(b)** GFP intensities were measured a frame before and a frame after a complete assembly-disassembly cycle in two independent experiments. 30 bacteria were analyzed per experiment. GFP intensities measured in *F. novicida* U112 *igIA-sfGFP* wild-type and  $\Delta pdpB$  were compared in four independent experiments. 30 bacteria were analyzed per experiment. Standard deviation was calculated.

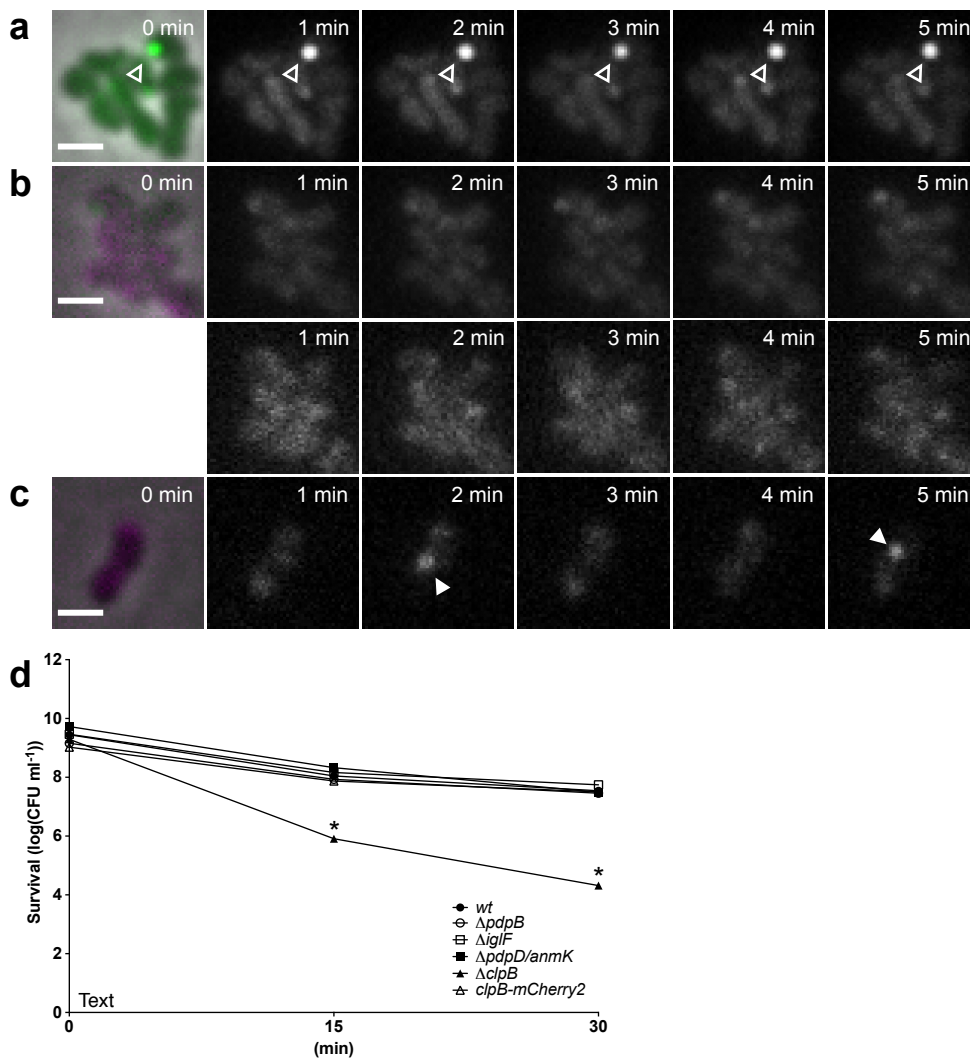

**Supplementary Figure 2: T6SS activity is required for ClpB spot localization but dispensable for ClpB-dependent heat tolerance.** (a) IgIA-sfGFP localization and foci (empty arrowheads) in *F. novicida* U112 *iglA*-sfGFP  $\Delta clpB/pdpB$ . First image is a merge of phase contrast and GFP channels, following images represent GFP channel only.  $3.3 \times 3.3 \mu\text{m}$  fields of view are shown. Scale bars represent  $1 \mu\text{m}$ . (b) IgIA-sfGFP and ClpB-mCherry2 localization in *F. novicida* U112 *iglA*-sfGFP *clpB*-mCherry2  $\Delta pdpB$ . First image is a merge of phase contrast, GFP and mCherry channels, following images represent GFP channel (upper panel) and mCherry channel (lower panel). (c) ClpB-mCherry2 localization dynamics in *F. novicida* U112 *clpB*-mCherry2. First image is a merge of phase contrast and mCherry channels, following images represent mCherry channel only. Arrowheads indicate ClpB recruitment. (d) Heat shock survival assay performed with *F. novicida* U112 *iglA*-sfGFP wild-type,  $\Delta pdpB$ ,  $\Delta iglF$ ,  $\Delta pdpD/anmK$ ,  $\Delta clpB$  and *clpB*-mCherry2 at  $50^\circ\text{C}$  for 0, 15 and 30 min. Data are pooled from three independent experiments. \* $P < 0.05$  (two-tailed unpaired *t*-test with Welch's correction). (a-c)  $3.3 \times 3.3 \mu\text{m}$  fields of view are shown. Scale bar represents  $1 \mu\text{m}$ .

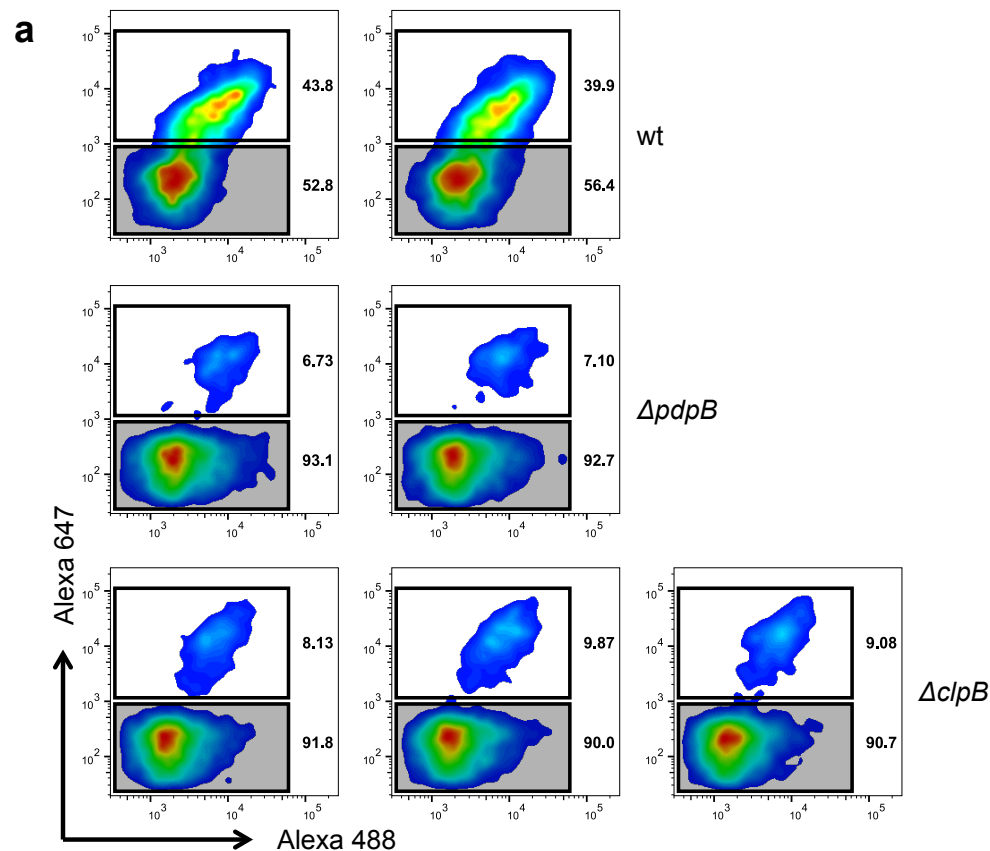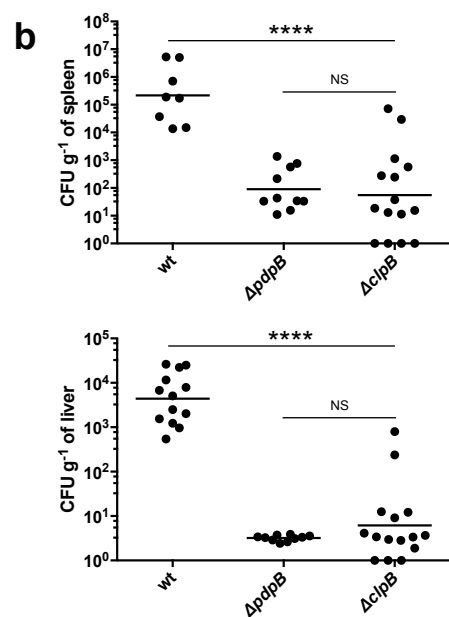

**Supplementary Figure 3: *F. novicida* U112 *iglA-sfGFP*  $\Delta clpB$  fails to escape into the cytosol and is avirulent *in vivo*.** (a) Representative FACS blots from the quantification of cytosolic (white gates) and vacuolar bacteria (grey gates) by flow cytometry in unprimed wild-type BMDMs 4 h after infection with *F. novicida* U112 *iglA-sfGFP* wild-type,  $\Delta pdpB$  or  $\Delta clpB$ . Numbers next to the gates indicate the percentage of cytosolic and vacuolar bacteria. (b) Bacterial burden (as colony-forming units (CFU) per gram tissue) in the spleen and liver of wild-type C57BL/6JRj mice infected subcutaneously for 2 days with  $1 \times 10^4$  *F. novicida* U112 *iglA-sfGFP* wild-type,  $\Delta pdpB$  or  $\Delta clpB$ . Each symbol represents an individual mouse ( $n = 8$  (wild-type), 10 ( $\Delta pdpB$ ), 15 ( $\Delta clpB$ ) (spleen), or  $n = 13$  (wild-type), 10 ( $\Delta pdpB$ ), 15 ( $\Delta clpB$ ) (liver)); small horizontal lines indicate the mean. Data are pooled from two independent experiments. \*\*\*\* $P < 0.0001$ ; NS - not significant (Mann-Whitney test).

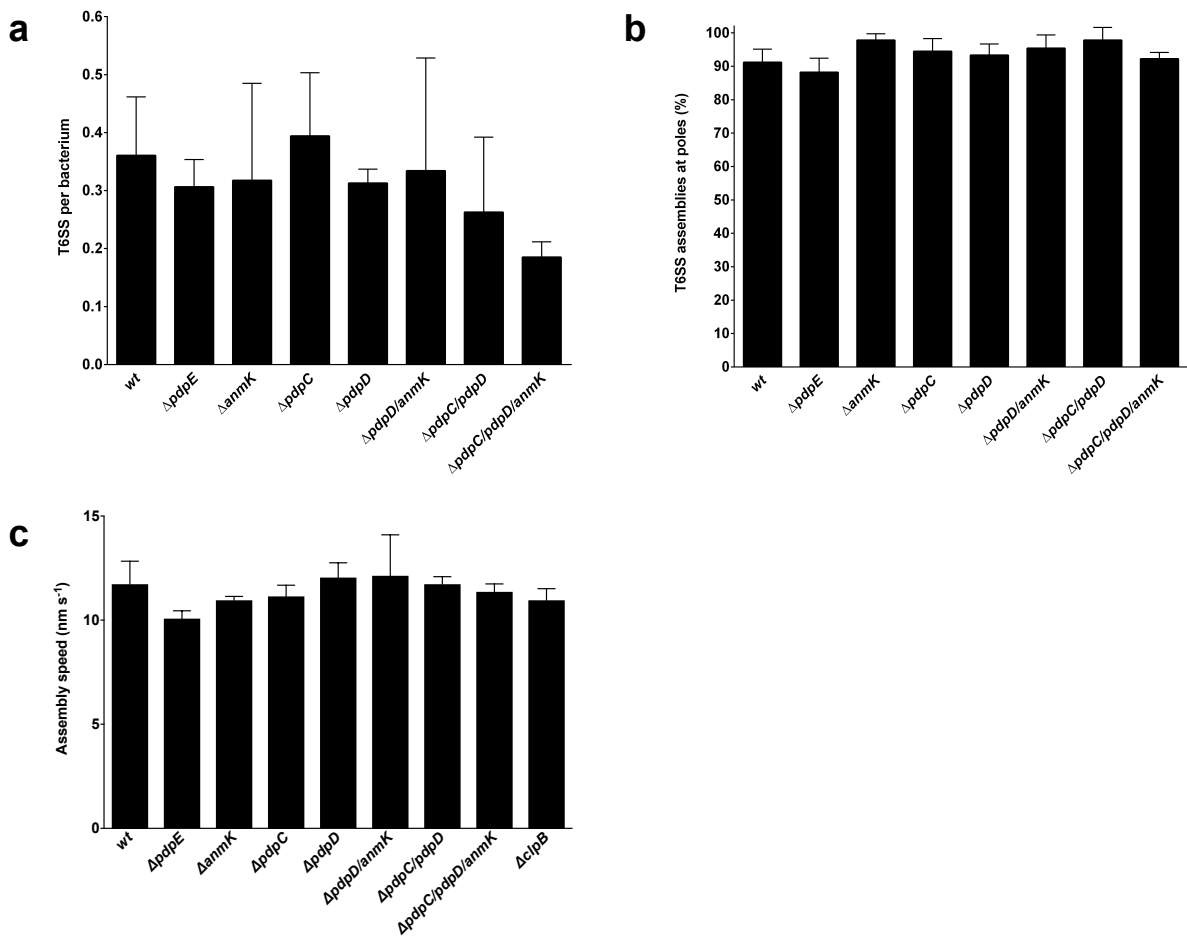

**Supplementary Figure 4: *pdpE*, *anmK*, *pdpC* and *pdpD* and play no role in T6SS sheath localization and dynamics.** (a) Quantification of number of T6SS sheath structures per bacterium within 5 min of imaging. (b) Quantification of T6SS sheath assembly at poles. (c) Quantification of T6SS assembly speed. Averages of three independent experiments. 30 bacteria per experiment were analyzed. Error bars represent standard deviation. No significant differences to wild-type (two-tailed unpaired *t*-test with Welch's correction).

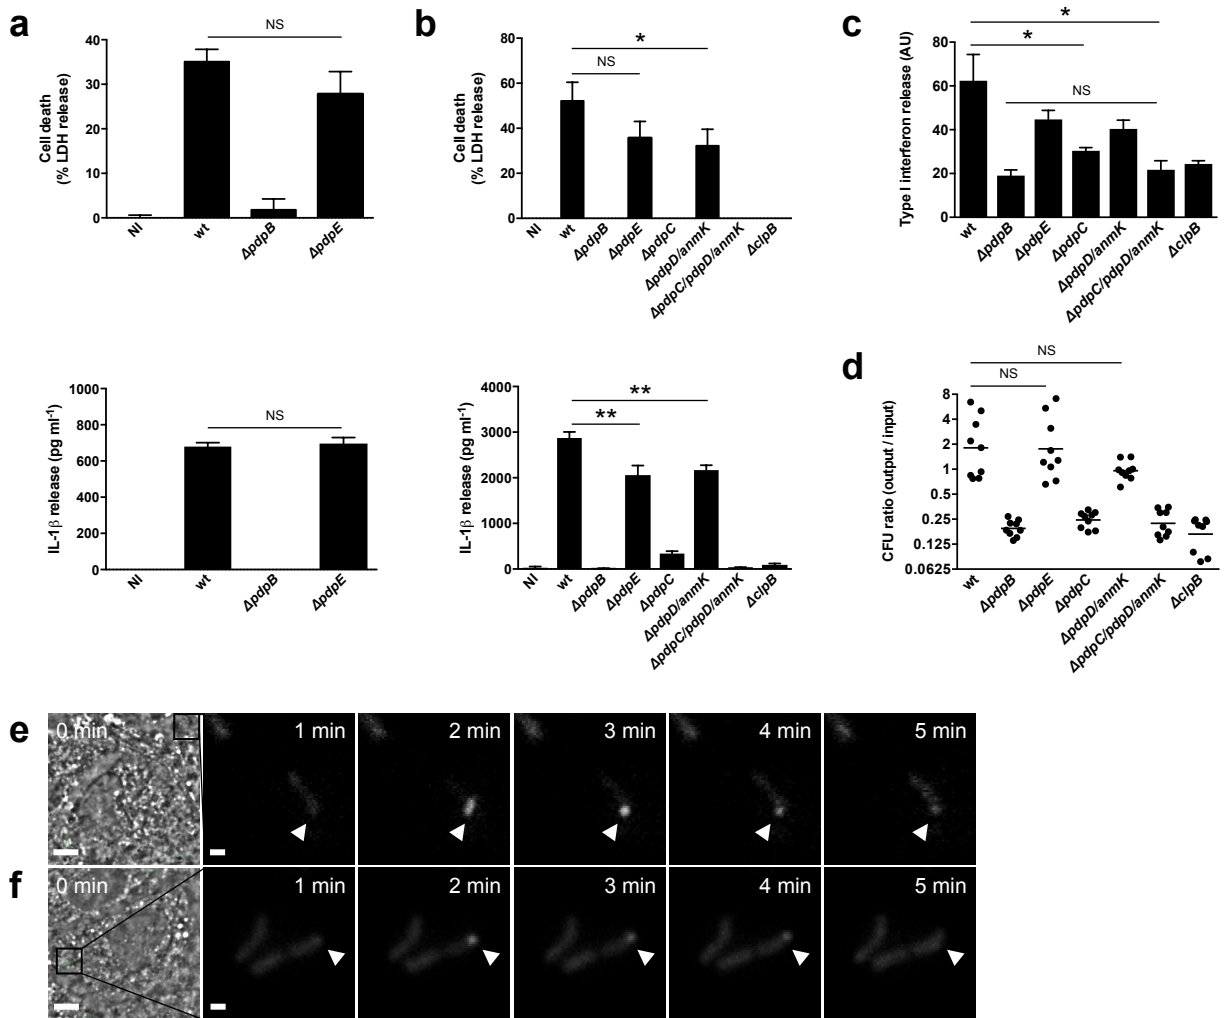

**Supplementary Figure 5: Putative effector mutants show distinct innate immune activation and survival within macrophages.** Release of LDH and IL-1 $\beta$  from (a) LPS-primed wild-type BMDMs 10 h or (b) unprimed wild-type BMDMs 24 h after infection with *F. novicida* U112 *iglA-sfGFP* wild-type,  $\Delta pdpB$ ,  $\Delta pdpE$ ,  $\Delta pdpC$ ,  $\Delta pdpD$ ,  $\Delta pdpD/anmK$ ,  $\Delta pdpC/pdpD/anmK$  or  $\Delta clpB$  (NI - noninfected control). (c) Quantification of type-I-interferon release in the supernatant of unprimed wild-type BMDMs infected for 10 h with *F. novicida* U112 *iglA-sfGFP* wild-type,  $\Delta pdpB$ ,  $\Delta pdpE$ ,  $\Delta pdpC$ ,  $\Delta pdpD$ ,  $\Delta pdpD/anmK$ ,  $\Delta pdpC/pdpD/anmK$  or  $\Delta clpB$ . (d) Intracellular growth within *Asc*<sup>-/-</sup> BMDMs during the first 24 h of infection with *F. novicida* U112 *iglA-sfGFP* wild-type,  $\Delta pdpB$ ,  $\Delta pdpE$ ,  $\Delta pdpC$ ,  $\Delta pdpD/anmK$ ,  $\Delta pdpC/pdpD/anmK$  or  $\Delta clpB$ . Growth was calculated as ratio of number of bacteria at 24 h (output) divided by the number of bacteria at 2 h (input). (f, e) Timelapse images from BMDMs infected for 1 h with *F. novicida* U112 *iglA-sfGFP*  $\Delta pdpE$  (e) and  $\Delta pdpC/pdpD/anmK$  (f). 30 x 30  $\mu\text{m}$  fields of view are shown. First image consists of merged phase contrast channel and GFP channel. Scale bar represents 5  $\mu\text{m}$ . The close ups show 5 x 5  $\mu\text{m}$ . Scale bar represents 1  $\mu\text{m}$ . Close ups consist of GFP channel. (a-d) Data are representatives of three independent experiments (a-c) (mean and standard deviation of triplicate wells are shown) or pooled from three independent experiments (small horizontal lines indicate the mean) (d). \* $P < 0.05$  and \*\* $P < 0.01$ ; NS - not significant (two-tailed unpaired *t*-test with Welch's correction).

**Supplementary Table 1: Strains used in this study, related to Material and Methods**

| Organism                         | Genotype                              | Relevant features                                                                         | Source                 |
|----------------------------------|---------------------------------------|-------------------------------------------------------------------------------------------|------------------------|
| <i>Francisella novicida</i> U112 | <i>iglA-sfGFP</i>                     | Parental strain, C-terminal chromosomal fusion of <i>sfGFP</i> to <i>iglA</i>             | (Clemens et al., 2015) |
|                                  | <i>iglA-sfGFP ΔpdpB</i>               | Deletion of <i>pdpB</i>                                                                   | This study             |
|                                  | <i>iglA-sfGFP ΔclpB</i>               | Deletion of <i>clpB</i>                                                                   | This study             |
|                                  | <i>iglA-sfGFP ΔclpB/pdpB</i>          | Deletion of <i>clpB</i> and <i>pdpB</i>                                                   | This study             |
|                                  | <i>iglA-sfGFP clpB-mCherry2</i>       | C-terminal chromosomal fusion of <i>mCherry2</i> to <i>clpB</i>                           | This study             |
|                                  | <i>iglA-sfGFP clpB-mCherry2 ΔpdpB</i> | C-terminal chromosomal fusion of <i>mCherry2</i> to <i>clpB</i> , deletion of <i>pdpB</i> | This study             |
|                                  | <i>clpB-mCherry2</i>                  | C-terminal chromosomal fusion of <i>mCherry2</i> to <i>clpB</i>                           | This study             |
|                                  | <i>iglA-sfGFP ΔiglF</i>               | Deletion of <i>iglF</i>                                                                   | This study             |
|                                  | <i>iglA-sfGFP ΔiglG</i>               | Deletion of <i>iglG</i>                                                                   | This study             |
|                                  | <i>iglA-sfGFP ΔiglI</i>               | Deletion of <i>iglI</i>                                                                   | This study             |
|                                  | <i>iglA-sfGFP ΔiglJ</i>               | Deletion of <i>iglJ</i>                                                                   | This study             |



|                                   |                                                       |            |
|-----------------------------------|-------------------------------------------------------|------------|
| <i>iglA-sfGFP ΔpdpE</i>           | Deletion of <i>pdpE</i>                               | This study |
| <i>iglA-sfGFP ΔanmK</i>           | Deletion of <i>anmK</i>                               | This study |
| <i>iglA-sfGFP ΔpdpC</i>           | Deletion of <i>pdpC</i>                               | This study |
| <i>iglA-sfGFP ΔpdpD</i>           | Deletion of <i>pdpD</i>                               | This study |
| <i>iglA-sfGFP ΔpdpD/anmK</i>      | Deletion of <i>pdpD</i> and <i>anmK</i>               | This study |
| <i>iglA-sfGFP ΔpdpC/pdpD</i>      | Deletion of <i>pdpC</i> and <i>pdpD</i>               | This study |
| <i>iglA-sfGFP ΔpdpC/pdpD/anmK</i> | Deletion of <i>pdpC</i> , <i>pdpD</i> and <i>anmK</i> | This study |

**Supplementary Table 2: Plasmids used to generate in-frame deletions in this study, related to Material and Methods**

| <b>Plasmid Name</b>         | <b>Peptide scar left on the chromosome after allelic exchange</b> | <b>Primers used to generate in-frame deletion</b> |                                                     |
|-----------------------------|-------------------------------------------------------------------|---------------------------------------------------|-----------------------------------------------------|
| pDMK3- $\Delta$ <i>pdpB</i> | MNFIQKQGEVNVQ*                                                    | dFTN_1310_Del1_Xho1.FOR                           | TCAGTACTCGAGCAACTATATGAAAACCTTACATAATT              |
|                             |                                                                   | dFTN_1310_Del1.REV                                | CTCCTTGTTTTTGAATAAAATTCATACTTTTAATTT                |
|                             |                                                                   | dFTN_1310_Del2_.FOR                               | ATGAATTTTATTCAAAAACAAGGAGAAGTTAATGT                 |
|                             |                                                                   | dFTN_1310_Del2.REV                                | ATAATAGCGGCCGCTTAGCAGAGCTTTTTATATT                  |
|                             |                                                                   | dFTN_1310_Det_FOR                                 | ACATCAAGAAATACTCTGCCCTTC                            |
|                             |                                                                   | dFTN_1310_Det_REV                                 | TATTATTATCCAACCATTGTTGCTG                           |
| pDMK3- $\Delta$ <i>clpB</i> | MNINKFTIKLANNITFSK*                                               | dFTN_1743_1_Spe1.FOR                              | TCAGTAACTAGTAGATAAATGCGACTATTGATG                   |
|                             |                                                                   | dFTN_1743_1.REV                                   | TAATATTGTTATTAGCTAGTTTTATTGTAAATTTATTTATATTCATTATTT |

dFTN\_1743\_2.FOR ATTTACAATAAAACTAGCTAATAACAATATTACATTCTCTAAA

dFTN\_1743\_2\_Sac1.REV TCAGTAGAGCTCTCTTTTGTTCATTGCAAAGA

dFTN\_1743\_Det.FOR CAAGAATTCCATCAACCCAGA

FTN\_1743-mCherry\_Det\_REV CCATCAAACCTTAACAAAAGCTCCT

---

FTN\_1743-mcherry1\_Spe1.FOR TCAGTAACTAGTGGTGTTCGGTAAACTGA

FTN\_1743-mcherry1.REV CGGCCGCTTTAGAGAATGTAATATTGTTATTAGCG

FTN\_1743-mcherry2.FOR CTCTAAAGCGGCCGCAGGA

FTN\_1743-mcherry2.REV ATTAAACCGATTTTACTTGTACAGCTCGTC

pDMK3-clpB-mCherry2

FTN\_1743-mcherry3.FOR CTGTACAAGTAAAATCGGTTTAATCAATATCTAAATTAT

FTN\_1743-mcherry3\_Sac1.REV TCAGTAGAGCTCGCTTTATAAGTTAGATTAATAGAGTTTG

FTN\_1743-mcherry\_Det\_FOR GATGGAAGGCGAAAAAGACA

FTN\_1743-mcherry\_Det\_REV CCATCAAACCTTAACAAAAGCTCCT

---

---

|                     |                      |                      |                                         |
|---------------------|----------------------|----------------------|-----------------------------------------|
|                     |                      | dFTN_1313_1_Spe1.FOR | TCAGTAACTAGTTTTCTCAAAGAATATATGATGATAATG |
| pDMK3- <i>ΔiglF</i> | MNNDIDKWFESKQEAYWKI* | dFTN_1313_1.REV      | TTGCTTGCTTTCAAACCATTTATCAATATCATTATT    |
|                     |                      | dFTN_1313_2.FOR      | TGGTTTGAAAGCAAGCAAGAAGC                 |
|                     |                      | dFTN_1313_2_Sac1.REV | TCAGTAGAGCTCTATTTCTAATAAGCATGATTTA GGAA |
|                     |                      | dFTN1313_Det.FOR     | CTGGGTAATCAAGCACAAAGGT                  |
|                     |                      | dFTN1313_Det.REV     | GTGGCAAAGCTAGGATCTTCT                   |

---

|                     |                      |                      |                                            |
|---------------------|----------------------|----------------------|--------------------------------------------|
|                     |                      | dFTN_1314_1_Xho1.FOR | TCAGTACTCGAGATAAAAAATCAACTCTACAAAAACC      |
|                     |                      | dFTN_1314_1.REV      | TTTGTCCACCTTTTAAGGAGTCATTTATAATATTTAACATT  |
| pDMK3- <i>ΔiglG</i> | MLNIINDSLKGGQINVKTS* | dFTN_1314_2.FOR      | CTCCTTAAAAGGTGGACAAATAAATGTAAA             |
|                     |                      | dFTN_1314_2_Not1.REV | TCAGTAGCGGCCGCTAATTTTTTCGTCATTATAGTTTTTCAG |
|                     |                      | dFTN_1314_Det.FOR    | TTTCGCTAACGTCACTACAAGC                     |
|                     |                      | dFTN_1314_Det.REV    | TCATCGAAGCAAATGAGGTG                       |

---

|                     |                                      |                      |                                                   |
|---------------------|--------------------------------------|----------------------|---------------------------------------------------|
|                     |                                      | dFTN_1317_1_Xho1.FOR | TCAGTACTCGAGAAATTTATAAATCAAACACCTTTAGC            |
|                     |                                      | dFTN_1317_1.REV      | TTCTACCGAATCATTATTTAGTGTAGATATTATCTGACT           |
| pDMK3- <i>ΔiglI</i> | MSQIISTLNNDSVEKISNEIDED<br>YFEDLFDI* | dFTN_1317_2.FOR      | ACACTAAATAATGATTCCGGTAGAAAAAATTT                  |
|                     |                                      | dFTN_1317_2_NotI.REV | TCAGTAGCGGCCGCATTTCAAGTTCTATCTTAAATGGG            |
|                     |                                      | dFTN_1317_Det.FOR    | ATCGCAGCACACAATCTTTAAA                            |
|                     |                                      | dFTN_1317_Det.REV    | TCAGATAGTGATTCCGGATTTTTCA                         |
|                     |                                      | dFTN_1318_1_Xho1.FOR | TCAGTACTCGAGATAACATAGATTCTATTATAGAAATTGTACA       |
|                     |                                      | dFTN_1318_1.REV      | CCTAGATATATCTGTTGTTTATATGTCAAAAAGATCTTCAA         |
| pDMK3- <i>ΔiglJ</i> | MKTILKIFLTYKQIYLGYNL*                | dFTN_1318_2.FOR      | GATCTTTTTGACACAGATATATCTAGGTTATTTAATTTATG         |
|                     |                                      | dFTN_1318_2_NotI.REV | TCAGTAGCGGCCGCATCATTGCGCTTATTTCAA                 |
|                     |                                      | dFTN_1318_Det.For    | CGCAAATGCAGAATCAAGAA                              |
|                     |                                      | dFTN_1318_Det.Rev    | CGACTAGCGGTCTAAAAATG                              |
|                     |                                      | dFTN_1320_1_Xho1.FOR | TCAGTACTCGAGACCAACAGAAGAAACTTTG                   |
| pDMK3- <i>ΔpdpE</i> | MSKKVFQLLLHYEKKITII*                 | dFTN_1320_1.REV      | ATTTTCTTTTCATAATGTAATAATAATTGAAATACTTTTTACTCATATT |

|                      |                                                 |
|----------------------|-------------------------------------------------|
| dFTN_1320_2.FOR      | ATTTCAATTATTATTACATTATGAAAAGAAAATTACTATAATATAAC |
| dFTN_1320_2_Not1.REV | TCAGTAGCGGCCGCGGTGATATTTTTGTAAAACCTTAATAGG      |
| dFTN_1320_Det.FOR    | GGGTTGGGCTATCACATCAA                            |
| dFTN_1320_Det.REV    | GTTGAAAGTTTGCAGACAGGTC                          |

---

|                         |                                           |
|-------------------------|-------------------------------------------|
| dFTN_1326_1_Xho1.FOR    | TCAGTACTCGAGCTTAGGTATAATGGAATAAATGATTTAAC |
| dFTN_1326_1.REV         | GTGTAGGAATCATACCATCTGCAACCG               |
| dFTN_13125-26_2.FOR     | CTATACTTTCTGATTCCTACACAATATTTATATTCAC     |
| dFTN_1325-26_2_Sac1.REV | TCAGTAGAGCTCGTGTATCTGCTAAAAAATTAGAGT      |
| dFTN_1326_Det.For       | GCCGATGAAGCTTTACCACT                      |
| dFTN_1325-26_Det.REV    | TGCCTGCAGTAATATTCAAAGC                    |

---

|                      |                                           |
|----------------------|-------------------------------------------|
| dFTN_1319_1_Xho1.FOR | TCAGTACTCGAGCTAAATAACTTTGTGAGCCTTC        |
| dFTN_1319_1.REV      | TTTAAAAAAGTCTGAATAGATATTTAGTTCATATTTGTCTG |
| dFTN_1319_2.FOR      | GAACTAAATATCTATTCAGACTTTTTTAAAAAATATCGTC  |
| dFTN_1319_2_Not1.REV | TCAGTAGCGGCCGCTGATAATATCGATGCAATATATGAAA  |

pDMK3- $\Delta$ *anmK*

LSEYKYCVGIIPSATGAKS  
RVILGQINFF\*

pDMK3- $\Delta$ *pdpC*

MNDKYELNIYSDFFKISS\*

dFTN\_1319\_Det.For CCAGAATGATTCGGTAGAAAAA

dFTN\_1319\_Det.Rev AAAGGAAAGCAACAGCTCCA

---

dFTN\_1325\_1\_Xho1.FOR TCAGTACTCGAGCACTATCAACTTCTGTAGATCC

dFTN\_1325-26\_1.REV TGTGTAGGAATCAGAAAGTATAGACCAATGATC

dFTN\_13125.FOR GTCTATACTTTCTTACTTTTTCTTTTTTGAGGTCA

dFTN\_1325\_2\_Not1.REV TCAGTAGCGGCCGCCTAAAAATGCAAATATTGATGATATTTATG

dFTN\_1325-26\_Det.FOR GCACCTTTAGCCATTCTTGCT

dFTN\_1325\_Det.Rev AGGAGATATCGCTGCTGGAG

---

dFTN\_1325-26\_1\_Spe1.FOR TCAGTAACTAGTCACTATCAACTTCTGTAGATCC

dFTN\_1325-26\_1.REV TGTGTAGGAATCAGAAAGTATAGACCAATGATC

dFTN\_13125-26\_2.FOR CTATACTTTCTGATTCCTACACAATATTTATATTCAC

dFTN\_1325-26\_2\_Sac1.REV TCAGTAGAGCTCGTGTATCTGCTAAAAAATTAGAGT

pDMK3- $\Delta$ pdpD

MDQDINDLLYDTDDLKKEKVR  
KYRPMIWV\*

pDMK3- $\Delta$ pdpD/anmK

LSEYKYCVGIRKYRPMIWV\*

dFTN\_1325-26\_Det.FOR

GCACCTTTAGCCATTCTTGCT

dFTN\_1325-26\_Det.REV

TGCCTGCAGTAATATTCAAAGC

---
